# Supplementary material
Source: publisher figshare collection journal article supplement (https://springernature.figshare.com/ndownloader/files/13083680)
Supplement: Supplementary file 1 [file 13083680]

**Additional file 1**

**Foreign Language Anxiety Scale**

| **No.** | **Pernyataan** | **SS** | **S** | **N** | **TS** | **STS** |
| --- | --- | --- | --- | --- | --- | --- |
| 1. | Saya tidak pernah merasa yakin dengan diri saya sendiri setiap kali saya berbicara di dalam kelas bahasa asing. |  |  |  |  |  |
| 2. | Saya tidak khawatir membuat kesalahan di dalam kelas bahasa asing. |  |  |  |  |  |
| 3. | Saya bersikap tenang ketika nama saya dipanggil di dalam kelas bahasa asing. |  |  |  |  |  |
| 4. | Saya takut jika saya tidak memahami apa yang dikatakan oleh guru di dalam kelas bahasa asing. |  |  |  |  |  |
| 5. | Saya menikmati kelas bahasa asing yang saya ikuti. |  |  |  |  |  |
| 6. | Saya menganggap bahwa mahasiswa lain memiliki kemampuan berbahasa asing yang lebih baik dibanding saya. |  |  |  |  |  |
| 7. | Saya biasa bersikap tenang selama tes dalam kelas bahasa asing yang saya ikuti. |  |  |  |  |  |
| 8. | Saya merasa panik ketika harus berbicara tanpa persiapan di dalam kelas bahasa asing. |  |  |  |  |  |
| 9. | Saya tidak mengerti mengapa ada beberapa orang yang begitu khawatir dengan kelas bahasa asing. |  |  |  |  |  |
| 10. | Dalam kelas bahasa asing, saya bisa menjadi begitu cemas (*nervous*) sehingga melupakan hal-hal yang sebenarnya saya tahu. |  |  |  |  |  |
| 11. | Saya merasa malu saat menjawab pertanyaan dosen di dalam kelas bahasa asing. |  |  |  |  |  |
| 12. | Saya tidak merasa cemas berbicara dalam bahasa asing dengan penutur asli (*native speaker*) bahasa tersebut. |  |  |  |  |  |
| 13. | Saya tidak malu ketika guru memperbaiki kesalahan bahasa saya di dalam kelas. |  |  |  |  |  |
| 14. | Meskipun saya sudah mempersiapkan diri untuk kelas bahasa, saya tetap merasa cemas. |  |  |  |  |  |
| 15. | Saya sering merasa ingin tidak mengikuti kelas bahasa. |  |  |  |  |  |
| 16. | Saya merasa percaya diri ketika berbicara di dalam kelas bahasa asing. |  |  |  |  |  |
| 17. | Saya takut dosen akan memperbaiki setiap kesalahan bahasa asing yang saya buat. |  |  |  |  |  |
| 18. | Saya merasa sangat berdebar ketika dosen memanggil nama saya dalam kelas bahasa asing. |  |  |  |  |  |
| 19. | Semakin keras saya belajar untuk persiapan tes, saya menjadi semakin bingung. |  |  |  |  |  |
| 20. | Saya tidak merasakan adanya tekanan untuk melakukan persiapan yang baik dalam kelas bahasa. |  |  |  |  |  |
| 21. | Saya selalu merasa bahwa siswa-siswa lain berbicara bahasa asing lebih baik dibandingkan saya. |  |  |  |  |  |
| 22. | Saya merasa tidak percaya diri berbicara bahasa asing di depan siswa yang lain. |  |  |  |  |  |
| 23. | Saya merasa lebih tegang dan cemas saat belajar di dalam kelas bahasa asing dibandingkan dengan kelas lainnya. |  |  |  |  |  |
| 24. | Saya merasa cemas dan bingung ketika berbicara di dalam kelas bahasa. |  |  |  |  |  |
| 25. | Saat menuju kelas bahasa asing, saya merasa percaya diri dan rileks. |  |  |  |  |  |
| 26. | Saya cemas ketika tidak memahami setiap kata yang diucapkan oleh guru. |  |  |  |  |  |
| 27. | Saya tenang menghadapi tes bahasa asing karena saya sudah mempersiapkan diri sebelumnya. |  |  |  |  |  |
| 28. | Saya takut siswa-siswa yang lain akan menertawai saya ketika saya berbicara dalam bahasa asing. |  |  |  |  |  |
| 29. | Saya merasa nyaman berada di dekat penutur asli (*native speake*r) bahasa asing. |  |  |  |  |  |
| 30. | Saya tidak merasa malu ketika harus berbicara dalam bahasa asing di dalam kelas. |  |  |  |  |  |
| 31. | Saya tetap tenang jika tidak mampu menjawab pertanyaan dosen di dalam kelas bahasa asing. |  |  |  |  |  |
| 32. | Saya tidak khawatir berbicara basa asing di hadapan teman-teman di dalam kelas bahasa. |  |  |  |  |  |
| 33. | Saya suka mengajukan pertanyaan kepada penutur asli (*native speaker*) di dalam kelas bahasa. |  |  |  |  |  |
| 34. | Saya selalu merasa cemas ketika menghadapi ujian bahasa asing. |  |  |  |  |  |

**Language Learning Motivation Scale**

| **No.** | **Pernyataan** | **SS** | **S** | **N** | **TS** | **STS** |
| --- | --- | --- | --- | --- | --- | --- |
| 1. | Saya merasa bahasa asing tidak membantu saya mengembangkan diri. |  |  |  |  |  |
| 2. | Saya menganggap bahwa orang lain mengharapkan saya mempelajari bahasa asing. |  |  |  |  |  |
| 3. | Saya tidak merasa bersalah karena tidak menguasai bahasa asing. |  |  |  |  |  |
| 4. | Perasaan saya biasa saja ketika bisa memahami bahasa asing dan adat-istiadat orang-orangnya. |  |  |  |  |  |
| 5. | Saya belajar bahasa asing agar bisa mendapatkan pekerjaan yang bagus. |  |  |  |  |  |
| 6. | Saya tidak merasa bangga saat bisa mempelajari hal-hal baru mengenai bahasa asing. |  |  |  |  |  |
| 7. | Saya belajar bahasa asing supaya tidak malu saat berbicara dengan teman orang asing saya yang menggunakan bahasa tersebut. |  |  |  |  |  |
| 8. | Saya tidak merasa bangga ketika bisa menyelesaikan soal bahasa asing yang sulit. |  |  |  |  |  |
| 9. | Penguasaan bahasa asing bagus untuk pengembangan pribadi saya. |  |  |  |  |  |
| 10. | Saya merasa bangga karena menemukan sesuatu yang baru ketika mempelajari bahasa asing. |  |  |  |  |  |
| 11. | Saya tidak menikmati berbicara dalam bahasa asing. |  |  |  |  |  |
| 12. | Saya merasa bangga ketika bisa memahami struktur yang sulit dalam bahasa asing. |  |  |  |  |  |
| 13. | Saya merasa sangat senang saat berbicara dalam bahasa asing. |  |  |  |  |  |
| 14. | Saya tidak perlu menguasai bahasa asing. |  |  |  |  |  |
| 15. | Saya merasa biasa saja ketika mendengar bahasa asing. |  |  |  |  |  |
| 16. | Saya belajar bahasa asing supaya nanti bisa mendapatkan gaji yang tinggi. |  |  |  |  |  |
| 17. | Saya ingin menjadi orang yang mampu berbahasa asing. |  |  |  |  |  |
| 18. | Saya merasa biasa saja ketika bisa membaca buku berbahasa asing. |  |  |  |  |  |
| 19. | Saya tidak merasakan kesenangan meskipun berhasil dalam studi saya. |  |  |  |  |  |
| 20. | Saya merasa senang ketika mendengar bahasa asing diucapkan oleh penutur aslinya (*native speaker*). |  |  |  |  |  |
| 21. | Saya tidak memikirkan pekerjaan di masa depan ketika memilih bahasa asing yang akan saya pelajari. |  |  |  |  |  |
| 22. | Saya tidak merasa malu jika tidak dapat berbicara bahasa asing dengan penutur aslinya (*native speaker*). |  |  |  |  |  |

**Students’ Perception of Teachers’ Behaviors**

| **No.** | **Pernyataan** | **SS** | **S** | **N** | **TS** | **STS** |
| --- | --- | --- | --- | --- | --- | --- |
| 1. | Dosen sangat membantu saya memahami pelajaran di dalam kelas bahasa asing. |  |  |  |  |  |
| 2. | Dosen yang bersikap kaku dan keras membuat saya cemas setiap masuk ke kelasnya. |  |  |  |  |  |
| 3. | Dosen saya membuat belajar bahasa asing yang sulit itu terasa menyenangkan. |  |  |  |  |  |
| 4. | Dosen saya tidak kaku dan keras di dalam kelas bahasa asing. |  |  |  |  |  |
| 5. | Dosen saya tidak banyak membantu saya memahami pelajaran bahasa asing. |  |  |  |  |  |
| 6. | Dosen senantiasa bersikap mendominasi di dalam kelas bahasa asing. |  |  |  |  |  |
| 7. | Dosen memberikan banyak informasi baru mengenai budaya dari bahasa asing yang kami pelajari. |  |  |  |  |  |
| 8. | Dosen saya tidak memberikan instruksi yang kaku dan keras di dalam kelas bahasa asing. |  |  |  |  |  |
| 9. | Metode mengajar dosen tidak membantu meningkatkan pemahaman bahasa asing saya. |  |  |  |  |  |

**Open-ended Questions**

1) Gambarkan sejelas mungkin, situasi atau kejadian yang membuat Anda merasa cemas atau khawatir di dalam kelas bahasa asing yang Anda ikuti.

____________________________________________________________________________________________________________________________________________________________________

2) Menurut Anda, siapakah yang bertanggung jawab atas situasi atau kejadian yang Anda hadapi tersebut di atas? (berikan tanda **√** pada SATU pilihan yang Anda anggap paling bertanggung jawab)

Diri Anda sendiri ( ) Dosen Anda ( )

Fakultas/jurusan Anda ( ) Teman sekelas Anda ( )

Keluarga dekat Anda ( ) Takdir ( )

Kesempatan ( ) Orang asing ( )

Yang lain ( )

3) Bagaimana Anda menilai kemampuan bahasa asing Anda ketika berada dalam situasi atau kejadian yang membuat Anda cemas atau khawatir tersebut?

(Jelek) 1 2 3 4 5 (Baik sekali)

4) Jelaskan alasan apa yang membuat Anda memilih jurusan bahasa asing ini, dan apa rencana Anda setelah lulus dari jurusan bahasa asing tersebut?

_________________________________________________________________________________________________________________________________________________________________________________________________________________________________

**Background** **Information**

1. Nama (boleh inisial): _________________________________________________________
2. Jenis Kelamin: Laki-laki / Perempuan
3. Usia: _____________________________________________________________________
4. Suku asal: __________________________________________________________________
5. Tahun masuk universitas: ______________________________________________________
6. Program Studi / Jurusan: _______________________________________________________
7. Apakah Anda juga mengambil kuliah di jurusan/fakultas/universitas lain?

**Ya / tidak**

1. Jika jawaban Anda **Ya**, di mana? ________________________________________________
2. Mengapa Anda mengambil kuliah lain tersebut?

__________________________________________________________________________________________________________________________________________

1. Apakah bahasa yang sehari-hari Anda gunakan di keluarga Anda?

_____________________________________________________________________

1. Apakah Anda juga bisa menggunakan bahasa daerah dalam kehidupan sehari-hari? **Ya / tidak**
2. Jika jawaban Anda **Ya**, bahasa daerah apa sajakah itu? _______________________________
3. Mengapa Anda memilih program studi bahasa asing yang Anda ikuti sekarang?

__________________________________________________________________________________________________________________________________________

1. Apakah ada keluarga Anda yang bisa berbahasa asing tersebut? **Ya / tidak**
2. Jika jawaban Anda **Ya**, siapa? __________________________________________________
3. Apakah ada keluarga Anda yang merupakan keturunan campuran dari orang yang berbahasa asing tersebut? **Ya / tidak**
4. Jika jawaban Anda **Ya**, siapa? __________________________________________________
5. Apakah Anda pernah berkunjung ke negara yang bahasanya sedang Anda pelajari saat ini? **Ya / tidak**
6. Jika jawaban Anda **Ya**, berapa lama? _____________________________________________
7. Apakah Anda memiliki teman dari negara yang memiliki bahasa asing tersebut? **Ya / tidak**
8. Jika jawaban Anda **Ya**, bahasa apa yang Anda gunakan untuk berkomunikasi? _____________________________________________________________________
9. Apakah Anda pernah mempelajari bahasa asing ini sebelumnya? **Ya / tidak**
10. Jika jawaban Anda **Ya**, kapan dan di mana? _______________________________________
11. Apakah Anda pernah mengikuti les/kursus bahasa asing? **Ya / tidak**
12. Jika jawaban Anda **Ya**, kapan dan di mana? _______________________________________
